# Supplementary material for: New Method for Optimization of Polymer Powder Plasma Treatment for Composite Materials
Source: MDPI journal article supplement (doi:10.3390/polym13060965), 2021-03-22
Supplement: s1 [file s1]

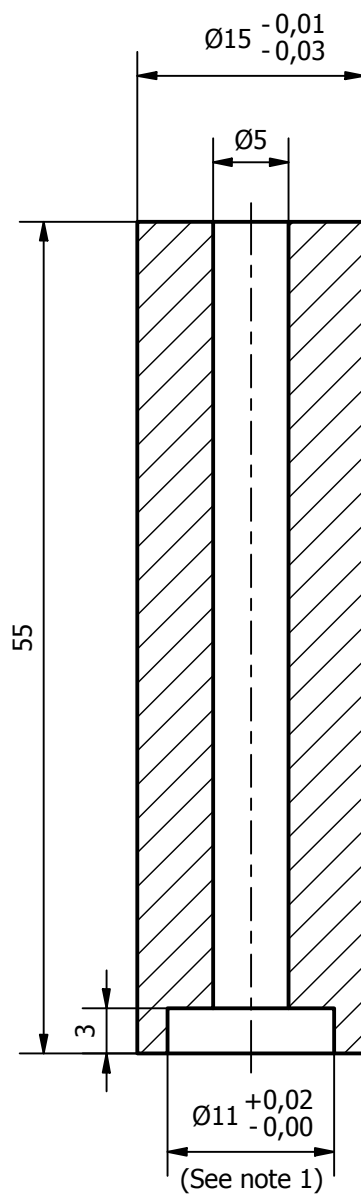

Made from circular rod  $\varnothing 15 \times 58$

Material EN 573-3 AW 6063 T66, EN 755-1,2,8 (Parts from this alloy had a tendency to get stuck and deformed easily. Therefore a harder aluminium alloy would be better for this application.)

Note 1: Prefer lower limit.

|                                |              |                                |                   |                |
|--------------------------------|--------------|--------------------------------|-------------------|----------------|
| Designed by<br>Zuzana Weberova | Scale<br>2:1 | Tolerance class<br>ISO 2786 mK | Date<br>9.10.2018 |                |
| CTU in Prague                  |              | Centering rod                  |                   |                |
|                                |              | DP-003                         | Edition           | Sheet<br>1 / 1 |
