# Supplementary material for: New Method for Optimization of Polymer Powder Plasma Treatment for Composite Materials
Source: MDPI journal article supplement (doi:10.3390/polym13060965), 2021-03-22
Supplement: s1 [file s1]

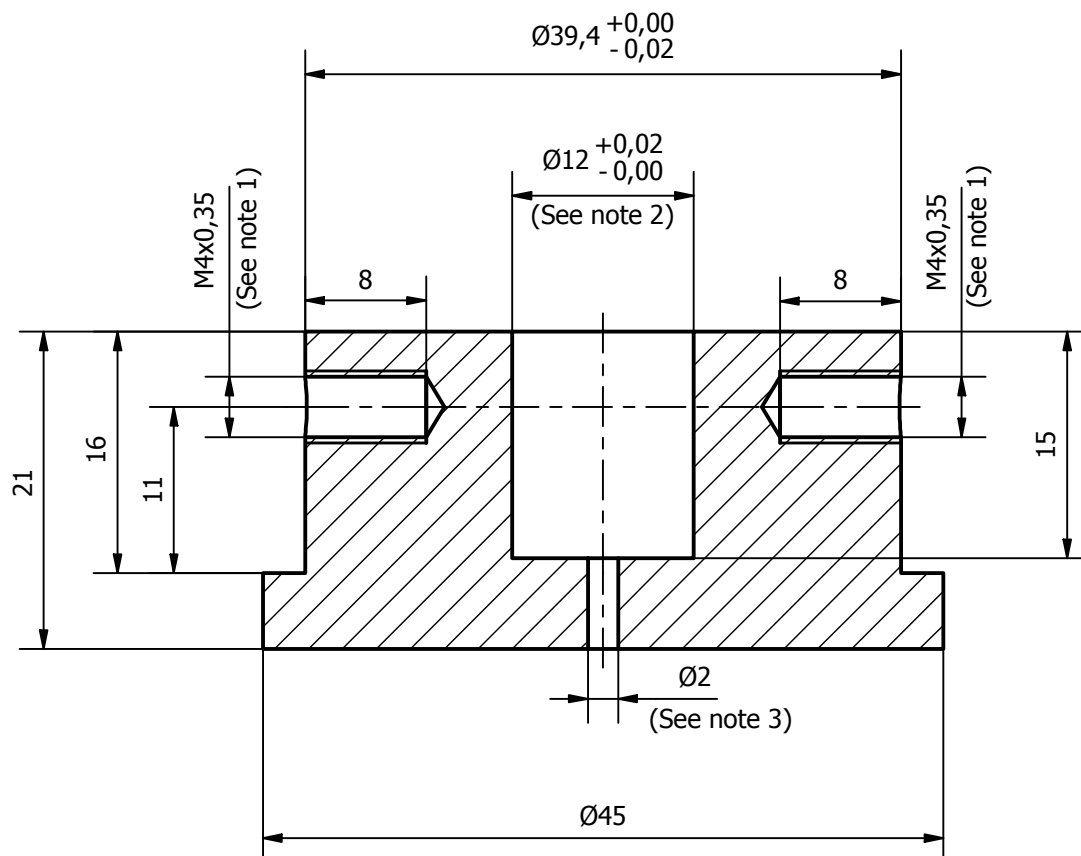

Made from circular rod  $\varnothing 45 \times 24$

Material EN 573-3 AW 6063 T66, EN 755-1,2,8 (Parts from this alloy had a tendency to get stuck and deformed easily. Therefore a harder aluminium alloy would be better for this application.)

Note 1: Thread size according to available screws. If different, change respective hole size in drawing DP-001.

Note 2: Designed for sample rods  $\varnothing 12h6$  or  $\varnothing 12h7$ . Diameter should correspond to available rods.

Note 3: Outlet channel is an optional, but useful feature - if oil lubrication is used for the  $\varnothing 12$  hole in combination with rods  $\varnothing 12h6$ , the system can act as a piston. It also prevents formation of under-pressure after heating-cooling cycle of sample preparation, that would hold a rod inside.

|                                |              |                                |                   |                |
|--------------------------------|--------------|--------------------------------|-------------------|----------------|
| Designed by<br>Zuzana Weberova | Scale<br>2:1 | Tolerance class<br>ISO 2786 mK | Date<br>9.10.2018 |                |
| CTU in Prague                  |              | Stand                          |                   |                |
|                                |              | DP-002                         | Edition           | Sheet<br>1 / 1 |
